# Supplementary material for: Evaluation of diverse polygenic risk score models for lung cancer in a small-scale Chinese cohort
Source: Front Genet. 2025 Jul 16;16:1646997. doi: 10.3389/fgene.2025.1646997 (PMC12307216; doi:10.3389/fgene.2025.1646997)
Supplement: Supplementary file 1 [file Table1.xlsx]

## Sheet: Table S1
Table S1. Clinical Characteristics of the Study Cohort (n = 90)
Variable	Statistic / n (%)
Age (years)
– Mean ± SD	63.3 ± 9.4
– Median (IQR)	64.0 (IQR: 14.8)
– Range	42.0 – 81.0
Cancer Type
– NSCLC	69 (76.7%)
– SCLC	21 (23.3%)
Histology
– LUAD	53 (58.9%)
– LUSC	16 (17.8%)
– SCLC	21 (23.3%)
Sex
– Female	27 (30.0%)
– Male	63 (70.0%)
Smoking Status
– Never smoker	55 (61.1%)
– Smoker (ever)	35 (38.9%)

## Sheet: Table S2
Table S2. Details on the characteristics of GWAS datasets used in this study.
Phenotype	Data source	Population	Total sample size	Ncase	Ncontrol	Source ID or Source link
Lung cancer	Sakaue S, Kanai M, Tanigawa Y, et al. A cross-population atlas of genetic associations for 220 human phenotypes. Nat Genet. 2021;53(10):1415-1424.	EAS	178726	4444	174282	https://pheweb.jp/pheno/LuC
Lung cancer	McKay JD, Hung RJ, Han Y, et al. Large-scale association analysis identifies new lung cancer susceptibility loci and heterogeneity in genetic susceptibility across histological subtypes. Nat Genet. 2017;49(7):1126-1132.	EUR	85716	29266	56450	GCST004748
